# Supplementary material for: ImpENSA eHealthy Conversation Skills training for healthcare professionals aimed at improving micronutrient status during the first 1000 days in South Africa
Source: PubMed Central journal article supplement (PMC11616819; doi:10.1371/journal.pgph.0003833), 2024-12-04

**S1 Fig.** ImpENSA Training Programme and module outlines

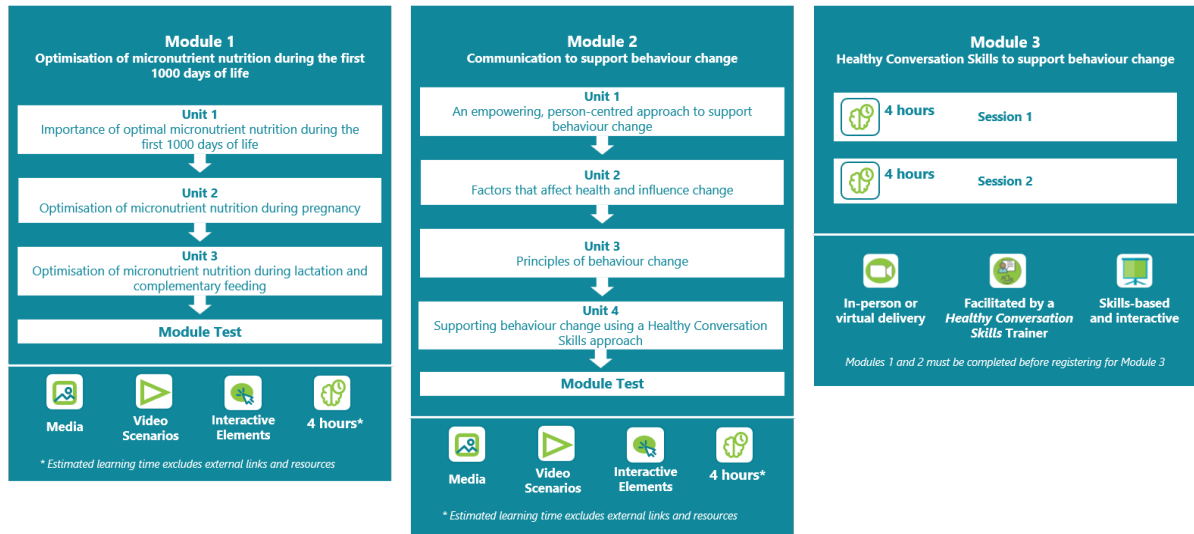

Supplement: pgph.0003833.s001.pdf [file pgph.0003833.s001.pdf]
