# Supplementary material for: ImpENSA eHealthy Conversation Skills training for healthcare professionals aimed at improving micronutrient status during the first 1000 days in South Africa
Source: PubMed Central journal article supplement (PMC11616819; doi:10.1371/journal.pgph.0003833), 2024-12-04
Supplement: pgph.0003833.s006.pdf [file pgph.0003833.s006.pdf]

**S1 Table.** Sample size available for data analysis at baseline, pre-, post-eHCS training and at follow-up among those who completed the training (n=27).

| <b>Data collection method</b> | <b>Baseline N (%)</b> | <b>Pre-eHCS N (%)</b> | <b>Post-eHCS N (%)</b> | <b>Follow-up N (%)</b> |
|-------------------------------|-----------------------|-----------------------|------------------------|------------------------|
| Assessment                    | 26 (96)*              | 26 (96)*              | 26 (96)*               | NA                     |
| Questionnaire                 | 27 (100)              | NA                    | 26 (96)*               | 24 (92)                |
| Interview                     | NA                    | NA                    | NA                     | 24 (92)                |

NA, not applicable

\*one participant out of 27 who completed eHCS training not included in the analysis due to technical issues with the assessment and questionnaire online data entry
