# Supplementary material for: ImpENSA eHealthy Conversation Skills training for healthcare professionals aimed at improving micronutrient status during the first 1000 days in South Africa
Source: PubMed Central journal article supplement (PMC11616819; doi:10.1371/journal.pgph.0003833), 2024-12-04
Supplement: pgph.0003833.s007.pdf [file pgph.0003833.s007.pdf]

**S2 Table.** Application of ODQs (*Follow-up study, N=24*)

I use Open Discovery Questions ('what' and 'how' questions) in my practice (1 –never, 2 – rarely, 3 – sometimes, 4 – often, 5 – always):

|                                                                                                              | Mean | Never  | Rarely | Sometimes | Often    | Always   |
|--------------------------------------------------------------------------------------------------------------|------|--------|--------|-----------|----------|----------|
| <b>a. To explore my patients' environments to identify barriers and facilitators for a behaviour change.</b> | 4.5  | 0 (0%) | 0 (0%) | 1 (4%)    | 10 (42%) | 13 (54%) |
| <b>b. To help my patients identify solutions that are appropriate for their circumstances.</b>               | 4.6  | 0 (0%) | 0 (0%) | 1 (4%)    | 8 (33%)  | 15 (63%) |
| <b>c. To support my patients in making a SMARTER plan for a behaviour change.</b>                            | 4.2  | 0 (0%) | 1 (4%) | 5 (21%)   | 9 (38%)  | 9 (38%)  |
| <b>d. To support my patients in evaluating and reviewing their SMARTER plan for a behaviour change.</b>      | 4.2  | 0 (0%) | 1 (4%) | 5 (21%)   | 9 (38%)  | 9 (38%)  |
